# Supplementary material for: Genome-wide DNA methylation detection by MethylCap-seq and Infinium HumanMethylation450 BeadChips: an independent large-scale comparison
Source: PubMed Central journal article supplement (PMC4612737; doi:10.1038/srep15375), 2015-10-20
Supplement: srep15375-s1.pdf [file srep15375-s1.pdf]

## Supplementary Information

### **Genome-wide DNA methylation detection by MethylCap-seq and Infinium HumanMethylation450 BeadChips: an independent large-scale comparison**

<sup>1</sup>Tim De Meyer, <sup>2,3,4</sup>Pierre Bady, <sup>1</sup>Geert Trooskens, <sup>2,3,5</sup>Sebastian Kurscheid<sup>§</sup>, <sup>5</sup>Jocelyne Bloch, <sup>6</sup>Johan M. Kros, <sup>7</sup>Johannes A. Hainfellner, <sup>5,8</sup>Roger Stupp, <sup>3,4</sup>Mauro Delorenzi, <sup>2,5</sup>Monika E. Hegi, <sup>1</sup>Wim Van Criekinge.

<sup>1</sup>Dept. of Mathematical Modelling, Statistics and Bioinformatics, Faculty of Bioscience Engineering, Ghent University, Ghent, Belgium

<sup>2</sup>Lab. of Brain Tumor Biology and Genetics, Department of Clinical Neurosciences, University Hospital Lausanne, Lausanne, Switzerland

<sup>3</sup>Swiss Institute of Bioinformatics, Lausanne, Switzerland

<sup>4</sup>Département de Formation et Recherche, University Hospital / University of Lausanne, Lausanne, Switzerland

<sup>5</sup>Neurosurgery, Department of Clinical Neurosciences, University Hospital Lausanne, Lausanne, Switzerland

<sup>6</sup>Division of Neuropathology, University Hospital Rotterdam, Rotterdam, The Netherlands

<sup>7</sup>Institute of Neurology, Medical University of Vienna, Vienna, Austria

<sup>8</sup>Department of Oncology, University Hospital Zurich, Zurich, Switzerland

<sup>§</sup>Current affiliation: The John Curtin School for Medical Research, The Australian National University, Canberra, Australia

**Supplementary Table S1** – HM450 BeadChip and MethylCap-seq data summary

| Sample number | Sample ID | HM450 excluded loci | HM450 beta-value | HM450 intensity | Mcap seq. depth | Mcap coverage |
|---------------|-----------|---------------------|------------------|-----------------|-----------------|---------------|
| 1             | 1076      | 169 (0.0348%)       | 0.536 (0.349)    | 29,109 (12,366) | 5,863,034       | 0.792 (4.906) |
| 2             | 1297      | 66 (0.0135%)        | 0.483 (0.334)    | 28,100 (12,634) | 3,444,194       | 0.453 (4.641) |
| 3             | 1308      | 305 (0.0628%)       | 0.529 (0.341)    | 24,118 (10,253) | 4,075,239       | 0.456 (3.062) |
| 4             | 1710      | 104 (0.0214%)       | 0.565 (0.348)    | 24,784 (11,233) | 3,780,961       | 0.588 (1.461) |
| 5             | 1357      | 92 (0.0189%)        | 0.597 (0.367)    | 25,611 (10,352) | 7,689,183       | 1.668 (4.499) |
| 6             | 1360      | 120 (0.0247%)       | 0.519 (0.350)    | 26,751 (11,485) | 2,934,773       | 0.320 (1.465) |
| 7             | 1399      | 276 (0.0568%)       | 0.519 (0.338)    | 27,924 (13,044) | 7,771,091       | 1.022 (3.339) |
| 8             | 1714      | 101 (0.0208%)       | 0.554 (0.346)    | 28,204 (11,733) | 3,730,539       | 0.451 (1.397) |
| 9             | 1430      | 82 (0.0168%)        | 0.513 (0.342)    | 24,155 (11,180) | 3,474,325       | 0.449 (1.519) |
| 10            | 1437      | 105 (0.0216%)       | 0.535 (0.341)    | 23,545 (10,422) | 3,860,504       | 0.555 (1.665) |
| 11            | 1496      | 104 (0.0214%)       | 0.588 (0.362)    | 24,557 (10,310) | 4,290,218       | 0.629 (1.616) |
| 12            | 1497      | 81 (0.0166%)        | 0.499 (0.336)    | 26,305 (12,082) | 4,438,217       | 0.649 (3.207) |
| 13            | 1543      | 106 (0.0218%)       | 0.497 (0.338)    | 30,462 (13,738) | 3,168,903       | 0.363 (1.234) |
| 14            | 1545      | 84 (0.0173%)        | 0.523 (0.341)    | 26,240 (11,099) | 3,665,563       | 0.474 (4.362) |
| 15            | 1552      | 70 (0.0144%)        | 0.515 (0.342)    | 27,215 (10,936) | 4,063,263       | 0.545 (2.689) |
| 16            | 1562      | 351 (0.0722%)       | 0.516 (0.345)    | 24,737 (9,926)  | 6,513,537       | 1.247 (4.481) |
| 17            | 1564      | 62 (0.0127%)        | 0.496 (0.338)    | 29,124 (11,914) | 7,081,936       | 1.245 (3.565) |
| 18            | 1566      | 391 (0.0805%)       | 0.511 (0.343)    | 27,031 (11,614) | 3,490,278       | 0.309 (1.624) |
| 19            | 1584      | 77 (0.0158%)        | 0.552 (0.361)    | 23,720 (10,677) | 4,755,629       | 0.705 (1.977) |
| 20            | 1587      | 360 (0.0741%)       | 0.532 (0.349)    | 26,902 (11,418) | 3,279,593       | 0.567 (1.843) |
| 21            | 1589      | 98 (0.0201%)        | 0.524 (0.338)    | 26,372 (11,421) | 3,485,154       | 0.382 (1.360) |
| 22            | 1591      | 100 (0.0205%)       | 0.539 (0.350)    | 24,612 (11,028) | 4,443,768       | 0.639 (1.642) |
| 23            | 1704      | 85 (0.0175%)        | 0.465 (0.325)    | 25,647 (11,265) | 3,943,860       | 0.343 (1.045) |
| 24            | 1603      | 69 (0.0142%)        | 0.543 (0.355)    | 25,693 (11,484) | 7,458,910       | 0.990 (5.326) |
| 25            | 1606      | 335 (0.0689%)       | 0.515 (0.344)    | 23,325 (10,365) | 8,082,158       | 1.640 (5.462) |
| 26            | 1612      | 180 (0.0370%)       | 0.515 (0.337)    | 23,449 (12,290) | 3,185,882       | 0.169 (1.141) |
| 27            | 1613      | 98 (0.0201%)        | 0.511 (0.341)    | 24,953 (11,807) | 4,031,830       | 0.385 (2.576) |
| 28            | 1730      | 84 (0.0173%)        | 0.499 (0.349)    | 26,412 (11,262) | 3,181,935       | 0.579 (1.625) |
| 29            | 1617      | 61 (0.0125%)        | 0.524 (0.343)    | 26,278 (10,700) | 4,669,502       | 1.312 (4.084) |
| 30            | 1622      | 47 (0.0096%)        | 0.555 (0.335)    | 28,211 (11,173) | 3,418,966       | 0.623 (1.819) |
| 31            | 1628      | 363 (0.0747%)       | 0.535 (0.349)    | 26,228 (10,483) | 3,143,970       | 0.507 (1.185) |
| 32            | 1639      | 164 (0.0337%)       | 0.527 (0.336)    | 28,752 (11,978) | 4,593,961       | 0.452 (1.668) |
| 33            | 1647      | 351 (0.0722%)       | 0.510 (0.331)    | 30,179 (12,628) | 4,972,501       | 0.727 (1.955) |
| 34            | 1703      | 89 (0.0183%)        | 0.554 (0.347)    | 27,307 (12,143) | 3,966,636       | 0.848 (2.036) |
| 35            | 1614      | 120 (0.0247%)       | 0.528 (0.355)    | 23,362 (10,955) | 4,481,043       | 0.568 (1.629) |
| 36            | 1705      | 116 (0.0238%)       | 0.549 (0.358)    | 30,546 (12,899) | 5,261,747       | 0.812 (1.891) |
| 37            | 1706      | 51 (0.0105%)        | 0.533 (0.336)    | 25,047 (10,191) | 5,176,570       | 0.725 (1.606) |
| 38            | 1419      | 380 (0.0782%)       | 0.518 (0.333)    | 22,566 (12,003) | 1,676,347       | 0.084 (0.353) |
| 39            | 1316      | 71 (0.0146%)        | 0.521 (0.348)    | 24,799 (10,431) | 4,731,366       | 0.264 (1.073) |
| 40            | 1601      | 336 (0.0692%)       | 0.505 (0.332)    | 24,623 (10,908) | 5,761,703       | 0.610 (1.538) |
| 41            | 1731      | 79 (0.0162%)        | 0.499 (0.346)    | 26,862 (11,498) | 4,277,480       | 0.369 (1.131) |
| 42            | 1759      | 83 (0.0170%)        | 0.522 (0.341)    | 25,880 (11,393) | 3,141,112       | 0.384 (1.352) |
| 43            | 1756      | 45 (0.0092%)        | 0.549 (0.357)    | 24,593 (10,389) | 35,271          | 0.005 (0.072) |

|    |      |               |               |                 |            |                |
|----|------|---------------|---------------|-----------------|------------|----------------|
| 44 | 2901 | 65 (0.0133%)  | 0.514 (0.351) | 26,777 (11,406) | 3,397,695  | 0.289 (2.135)  |
| 45 | 1752 | 73 (0.0150%)  | 0.551 (0.346) | 28,611 (11,533) | 16,554,961 | 1.072 (4.523)  |
| 46 | 2683 | 113 (0.0232%) | 0.510 (0.346) | 24,593 (10,913) | 3,340,906  | 0.294 (0.894)  |
| 47 | 2669 | 84 (0.0173%)  | 0.518 (0.342) | 25,766 (10,715) | 2,877,157  | 0.272 (0.777)  |
| 48 | 2540 | 93 (0.0191%)  | 0.524 (0.348) | 25,921 (10,755) | 3,056,287  | 0.376 (1.123)  |
| 49 | 2207 | 72 (0.0148%)  | 0.488 (0.334) | 22,140 (10,368) | 4,209,976  | 0.447 (1.435)  |
| 50 | 1780 | 51 (0.0105%)  | 0.518 (0.344) | 26,973 (11,335) | 6,805,473  | 0.454 (2.470)  |
| 51 | 1775 | 127 (0.0261%) | 0.530 (0.351) | 23,133 (9,882)  | 5,802,322  | 0.728 (2.881)  |
| 52 | 1774 | 126 (0.0259%) | 0.558 (0.353) | 27,078 (11,271) | 6,143,336  | 0.631 (3.455)  |
| 53 | 1769 | 152 (0.0313%) | 0.548 (0.343) | 27,860 (11,383) | 5,411,432  | 0.588 (3.668)  |
| 54 | 1768 | 352 (0.0725%) | 0.501 (0.334) | 25,938 (10,972) | 8,588,190  | 0.798 (2.906)  |
| 55 | 1766 | 75 (0.0154%)  | 0.528 (0.338) | 29,707 (12,919) | 4,203,162  | 0.484 (2.505)  |
| 56 | 1764 | 60 (0.0123%)  | 0.543 (0.357) | 24,138 (10,472) | 8,719,737  | 1.005 (3.216)  |
| 57 | 1763 | 104 (0.0214%) | 0.525 (0.352) | 24,860 (11,838) | 3,564,916  | 0.394 (1.461)  |
| 58 | 1761 | 75 (0.0154%)  | 0.544 (0.365) | 23,415 (10,301) | 3,377,179  | 0.472 (1.602)  |
| 59 | 1758 | 88 (0.0181%)  | 0.506 (0.345) | 23,347 (10,437) | 3,914,229  | 0.451 (1.716)  |
| 60 | 2903 | 378 (0.0778%) | 0.546 (0.344) | 26,988 (11,081) | 3,453,319  | 0.358 (1.512)  |
| 61 | 1755 | 302 (0.0622%) | 0.538 (0.348) | 26,670 (11,324) | 14,098,604 | 1.277 (10.652) |
| 62 | 2900 | 357 (0.0735%) | 0.535 (0.346) | 27,754 (11,726) | 3,105,763  | 0.293 (1.342)  |
| 63 | 1749 | 270 (0.0556%) | 0.529 (0.339) | 26,308 (10,598) | 3,545,171  | 0.442 (1.220)  |
| 64 | 1748 | 58 (0.0119%)  | 0.548 (0.362) | 23,940 (10,568) | 3,511,806  | 0.425 (1.466)  |
| 65 | 1732 | 373 (0.0768%) | 0.562 (0.349) | 25,470 (10,693) | 2,921,152  | 0.363 (1.500)  |
| 66 | 1729 | 106 (0.0218%) | 0.494 (0.344) | 30,402 (13,573) | 7,751,982  | 0.891 (3.037)  |
| 67 | 1709 | 94 (0.0193%)  | 0.508 (0.353) | 25,398 (11,359) | 2,647,993  | 0.330 (1.274)  |
| 68 | 1707 | 318 (0.0654%) | 0.510 (0.340) | 26,640 (10,889) | 3,156,515  | 0.375 (1.707)  |
| 69 | 1621 | 72 (0.0148%)  | 0.558 (0.353) | 25,055 (9,965)  | 6,911,561  | 0.731 (5.002)  |
| 70 | 1317 | 62 (0.0127%)  | 0.504 (0.334) | 24,536 (10,799) | 6,414,966  | 0.801 (6.436)  |

Sample number is used throughout manuscript, sample ID refers to identifiers used in data repositories (EGA and GEO). HM450 Excluded loci indicates the number (and percentage) of loci featured by a detection P-value > 0.05, of the total of 485,512 loci considered. HM450 beta-value and intensity indicate the average (standard deviation) beta-values resp. intensities (A + B probes) over all assessed loci for that sample (Infinium HM450 BeadChips); MCap seq. depth indicates the number of uniquely mapped fragments generated by MethylCap sequencing for that sample (with 2 sequences per fragment, due to the paired-end sequencing); MCap coverage indicates the average (standard deviation) MethylCap-seq coverage values for those loci assessed by Infinium HM450 BeadChips.

**Supplementary Table S2** – DNA methylation comparison between MSP, HM450 and MethylCap-seq for the locus interrogated by cg12981137 (MGMT)

| Platform | Cut-off | Status | U (MSP) | M (MSP) | Kappa (MSP) | Kappa (MCap/HM450) |
|----------|---------|--------|---------|---------|-------------|--------------------|
| HM450    | 0.2     | U      | 32      | 6       | 0.7565      | 0.5045             |
|          |         | M      | 2       | 26      |             |                    |
|          | 0.3     | U      | 33      | 9       | 0.6944      | 0.5372             |
|          |         | M      | 1       | 23      |             |                    |
|          | 0.4     | U      | 34      | 11      | 0.6630      | 0.5464             |
|          |         | M      | 0       | 21      |             |                    |
| MCap     |         | U      | 34      | 17      | 0.4762      |                    |
|          |         | M      | 0       | 15      |             |                    |

Count data reflect methylation status (U – unmethylated; M – methylated) as measured by Methylation Specific PCR (MSP) and compared with respectively Infinium HM450 BeadChips (HM450) and MethylCap-seq (MCap). For HM450, three different cut-offs (0.2, 0.3, 0.4) were used for beta-value dichotomization, as outlined in the main article. Concordance between MSP results and respectively HM450 and MCap is evaluated by the Kappa index, Kappa (MSP). Kappa (MCap/HM450) reflects the concordance between MCap and HM450 (for different HM450 cut-offs, independent of MSP results) for this locus.

**Supplementary Table S3** – HM450 outcome for significant MethylCap results targeted by HM450 probes

| Chrom. | Start       | End         | ProbeID       | Nearest gene (Func. loc.) | Fisher P | t-test P |
|--------|-------------|-------------|---------------|---------------------------|----------|----------|
| 1      | 182,809,473 | 182,810,798 | cg26546113    | DHX9 (5'UTR)              | 0.578    | 0.197    |
| 5      | 95,453,420  | 95,454,541  | cg14111437    | MIR583 (Intergenic)       | 1        | 0.078    |
| 11     | 7,259,144   | 7,259,475   | cg06712088    | SYT9 (Intergenic)         | 1        | 8.6E-9   |
| 11     | 7,259,144   | 7,259,475   | cg20653032    | SYT9 (Intergenic)         | 1        | 2.1E-6   |
| 18     | 43,355,234  | 43,356,159  | cg16245698    | SLC14A1 (Intergenic)      | 1        | 9.8E-3   |
| 18     | 43,355,234  | 43,356,159  | cg18088442    | SLC14A1 (Intergenic)      | 0.055    | 4.9E-8   |
| 18     | 43,355,234  | 43,356,159  | cg21691166    | SLC14A1 (Intergenic)      | 0.009    | 3.6E-6   |
| 18     | 43,355,234  | 43,356,159  | cg25416153    | SLC14A1 (Intergenic)      | 0.058    | 2.4E-4   |
| 20     | 17,115,552  | 17,115,823  | ch.20.356846R | PCSK2 (Intergenic)        | 1        | 1.5E-3   |

Data represent chromosome (chrom.), start and end position of Ziller regions that were significant upon Fisher exact test analysis of MethylCap-seq data (tumor samples vs. controls) and that were also targeted by Infinium HM450 probes. For the latter, probe identifier (ProbeID), symbol of nearest gene (according to UCSC Genome Browser on GRCh37/hg19 assembly) and functional location (Func. loc.) are presented as well as Fisher exact test (dichotomized data) and Welsh t-test (quantitative M-value data) P-values.

**Supplementary Table S4** – Comparison of MethylCap-seq and HM450 (cg21691166) results for the locus detected as significant by both methodologies (*cf.* Table S3)

| Controls (N = 5) |                      |              |
|------------------|----------------------|--------------|
|                  | <i>MethylCap-seq</i> |              |
| <i>HM450</i>     | Methylated           | Unmethylated |
| Methylated       | 0                    | 0            |
| Unmethylated     | 0                    | 5            |
| Tumours (N = 63) |                      |              |
|                  | <i>MethylCap-seq</i> |              |
| <i>HM450</i>     | Methylated           | Unmethylated |
| Methylated       | 35                   | 5            |
| Unmethylated     | 20                   | 3            |

Data represent contingency tables of methylation status as assessed by both methodologies separately for control and tumour samples

**Supplementary Table S5** – Significant differences stratified by CpG and functional location context annotation for both methodologies

| Annotation                 | MethylCap (N=233) | MethylCap (%) | HM450 (N=14434) | HM450 (%) |
|----------------------------|-------------------|---------------|-----------------|-----------|
| <i>CpG context</i>         |                   |               |                 |           |
| CpG-island                 | 1                 | 0.43          | 5,134           | 35.57     |
| Shore                      | 6                 | 2.58          | 3,493           | 24.20     |
| Shelve                     | 6                 | 2.58          | 748             | 5.18      |
| Open sea                   | 222               | 95.28         | 5,059           | 35.04     |
| <i>Functional location</i> |                   |               |                 |           |
| Promoter                   | 12                | 5.15          | 3,389           | 23.48     |
| Exon                       | 13                | 5.58          | 2,511           | 17.40     |
| Intron                     | 86                | 36.91         | 4,347           | 30.12     |
| Pseudogene                 | 1                 | 0.43          | 22              | 0.15      |
| Intergenic                 | 129               | 55.36         | 4,165           | 28.86     |

Data represent numbers and percentages of significantly differentially methylated loci stratified by CpG and functional location context. For MethylCap-seq, the used regions (Ziller cDMRs) may overlap with multiple elements, explaining why summed percentages exceed 100%.

**Supplementary Table S6** – Number of significant differences stratified by chromosome for both methodologies

| Chromosome | MethylCap | MethylCap (%) | HM450 | HM450 (%) |
|------------|-----------|---------------|-------|-----------|
| 1          | 12        | 5.15          | 1309  | 9.07      |
| 2          | 19        | 8.15          | 1248  | 8.65      |
| 3          | 22        | 9.44          | 677   | 4.69      |
| 4          | 17        | 7.30          | 627   | 4.34      |
| 5          | 23        | 9.87          | 873   | 6.05      |
| 6          | 13        | 5.58          | 1193  | 8.27      |
| 7          | 6         | 2.58          | 1092  | 7.57      |
| 8          | 14        | 6.01          | 661   | 4.58      |
| 9          | 15        | 6.44          | 283   | 1.96      |
| 10         | 17        | 7.30          | 595   | 4.12      |
| 11         | 15        | 6.44          | 751   | 5.20      |
| 12         | 10        | 4.29          | 770   | 5.33      |
| 13         | 15        | 6.44          | 344   | 2.38      |
| 14         | 7         | 3.00          | 453   | 3.14      |
| 15         | 8         | 3.43          | 445   | 3.08      |
| 16         | 7         | 3.00          | 542   | 3.76      |
| 17         | 1         | 0.43          | 739   | 5.12      |
| 18         | 7         | 3.00          | 218   | 1.51      |
| 19         | 1         | 0.43          | 604   | 4.18      |
| 20         | 3         | 1.29          | 328   | 2.27      |
| 21         | 1         | 0.43          | 142   | 0.98      |
| 22         | 0         | 0.00          | 209   | 1.45      |
| X          | 0         | 0.00          | 319   | 2.21      |
| Y          | 0         | 0.00          | 12    | 0.08      |



## Supplementary Figures

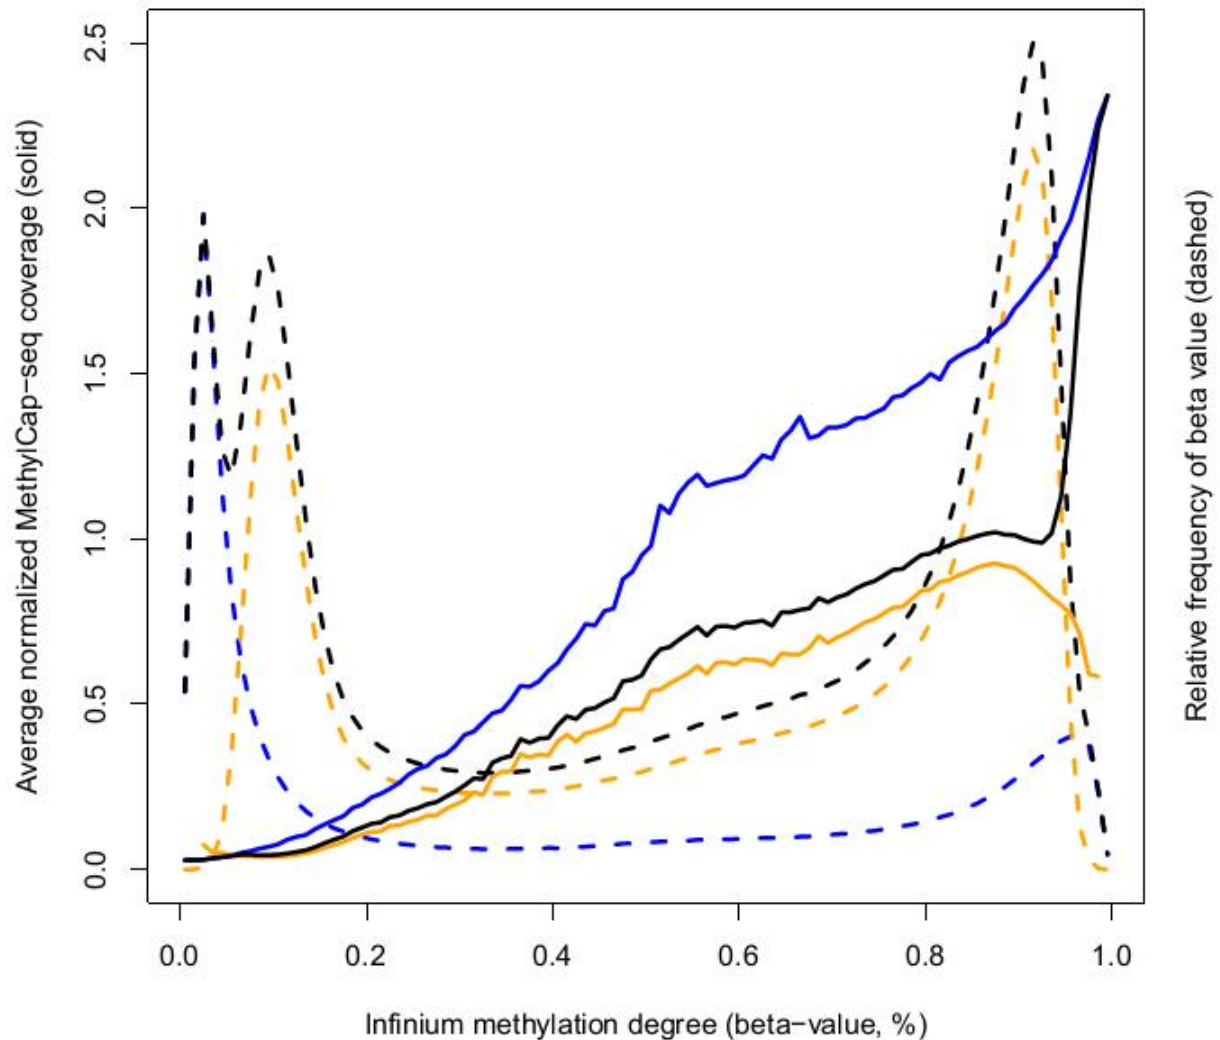

**Figure S1 - Concordance between MethylCap-seq (continuous) and Infinium HM450 BeadChip results.** The average MethylCap-seq coverage values (over all samples, solid lines) are plotted as a function HM450 methylation degrees (beta-values, binned per 1%), for both types of HM450 assays: type 1 (blue), type 2 (orange), and combined (black). The beta-value distributions are depicted as dashed lines for both types individually (type 1, blue; type 2, orange) and combined (black). MethylCap-seq values were normalized using library size normalization (= to the average library size).

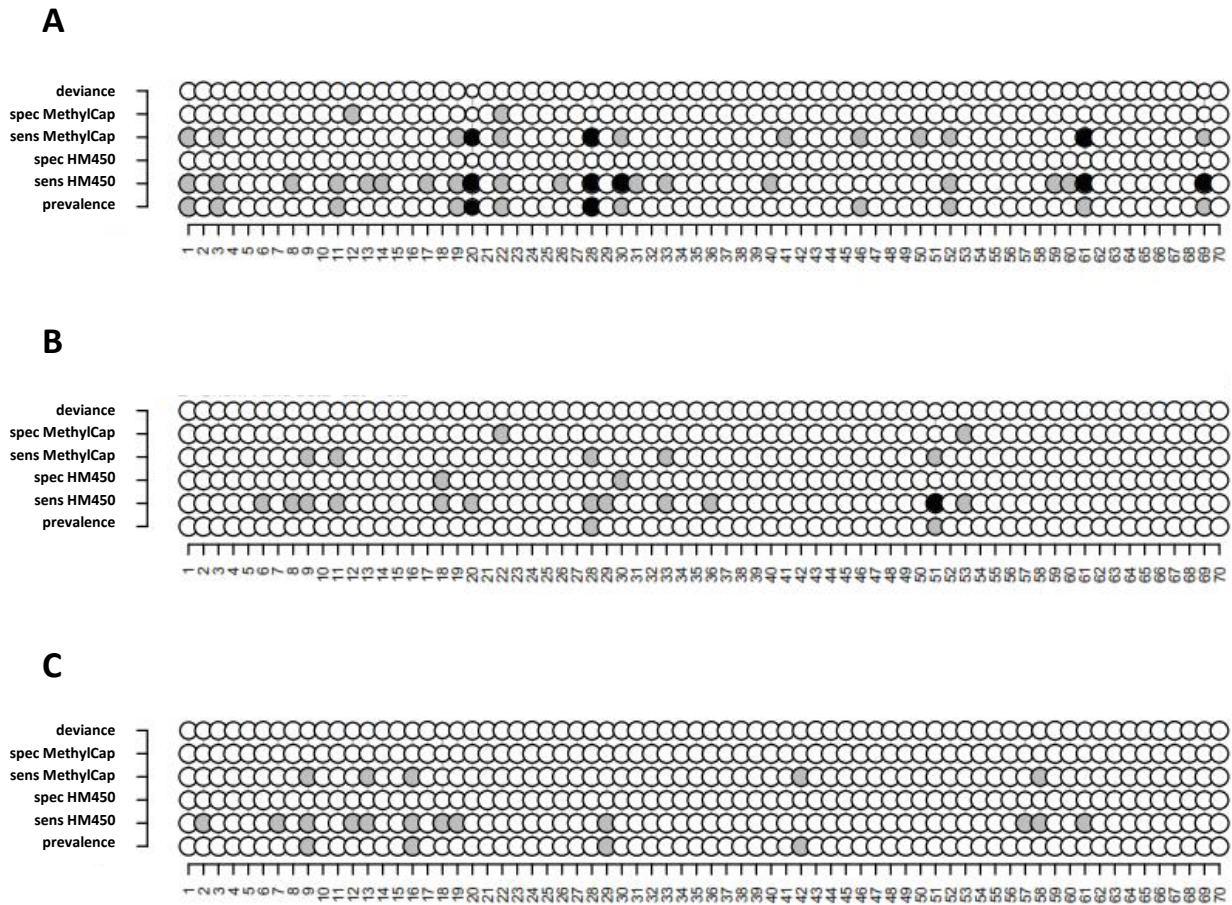

**Figure S2 – Model convergence regarding deviance, prevalence, sensitivity and specificity estimation for assay type 1 loci.** For each sample (X-axis), convergence results regarding deviance, specificity (spec), sensitivity (sens) and prevalence for both MethylCap-seq and Infinium HumanMethylation450k BeadChips (HM450) are summarized for different beta-value thresholds: 0.2 (panel A), 0.3 (panel B) and 0.4 (panel C). In general, models converged moderately ( $1.1 < \bar{R} \leq 1.5$ , grey) to very ( $\bar{R} \leq 1.1$ , white) well. For a beta-value threshold of 0.2, there were slightly more samples with lack of convergence ( $\bar{R} > 1.5$ , black).

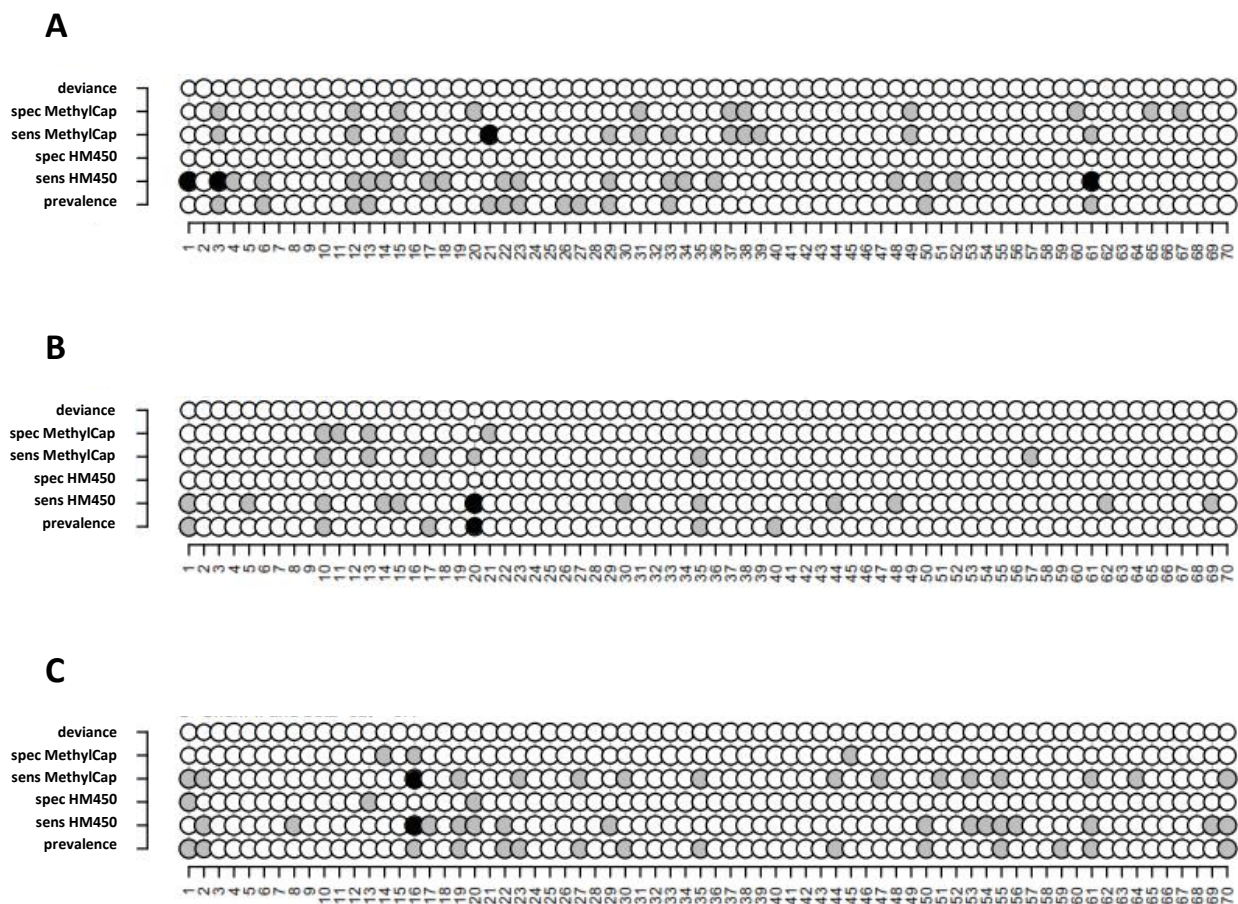

**Figure S3 – Model convergence regarding deviance, prevalence, sensitivity and specificity estimation for assay type 2 loci.** For each sample (X-axis), convergence results regarding deviance, specificity (spec), sensitivity (sens) and prevalence for both MethylCap-seq and Infinium HumanMethylation450k BeadChips (HM450) are summarized for different beta-value thresholds: 0.2 (panel A), 0.3 (panel B) and 0.4 (panel C). In general, models converged moderately ( $1.1 < \hat{R} \leq 1.5$ , grey) to very ( $\hat{R} \leq 1.1$ , white) well. For a beta-value threshold of 0.2, there were slightly more samples with lack of convergence ( $\hat{R} > 1.5$ , black).

**A**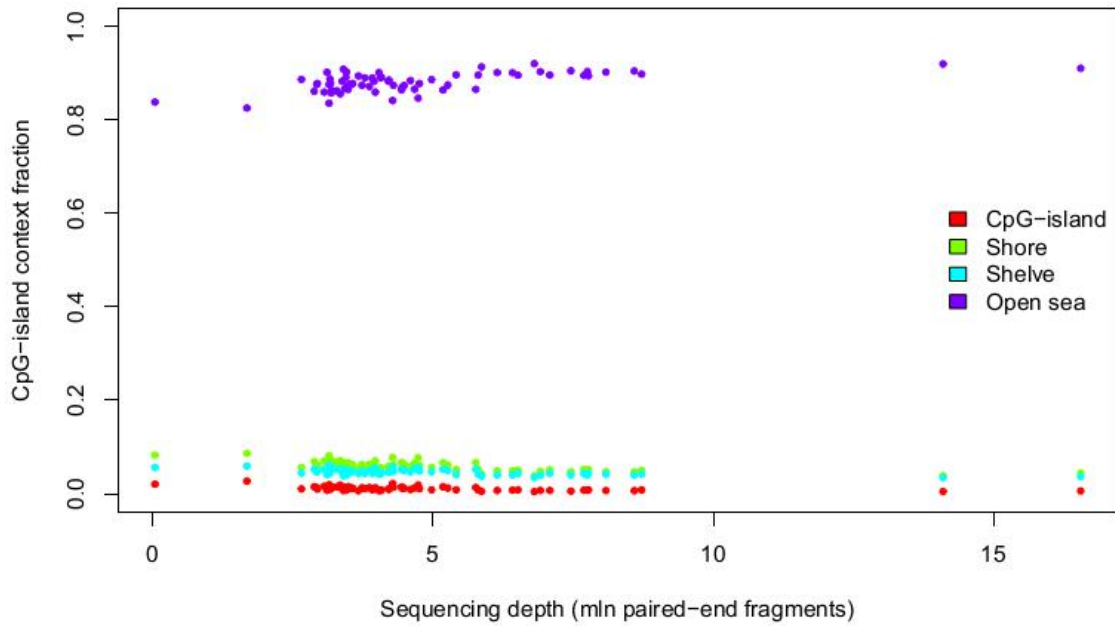**B**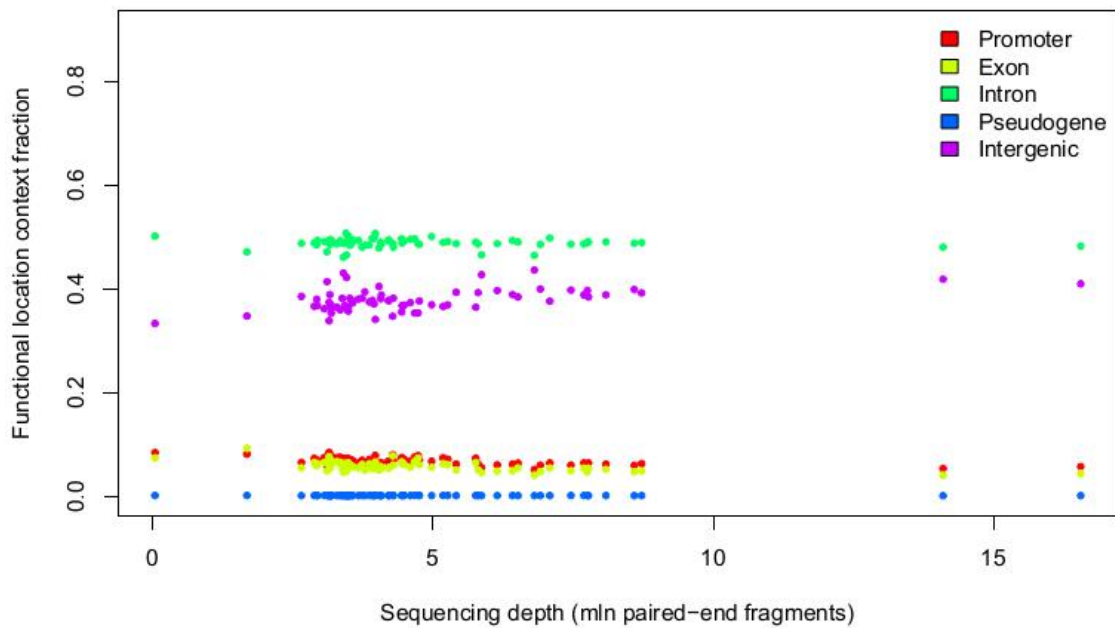

**Figure S4 - CpG-island context (A) and functional location (B) context fractions as a function of MethylCap-seq sequencing depth.** There is a significant increase of open sea (A) and intergenic (B) fractions, and a significant decrease of all other fractions - except introns - for higher sequencing depths (all  $P < 0.005$ , ANOVA).

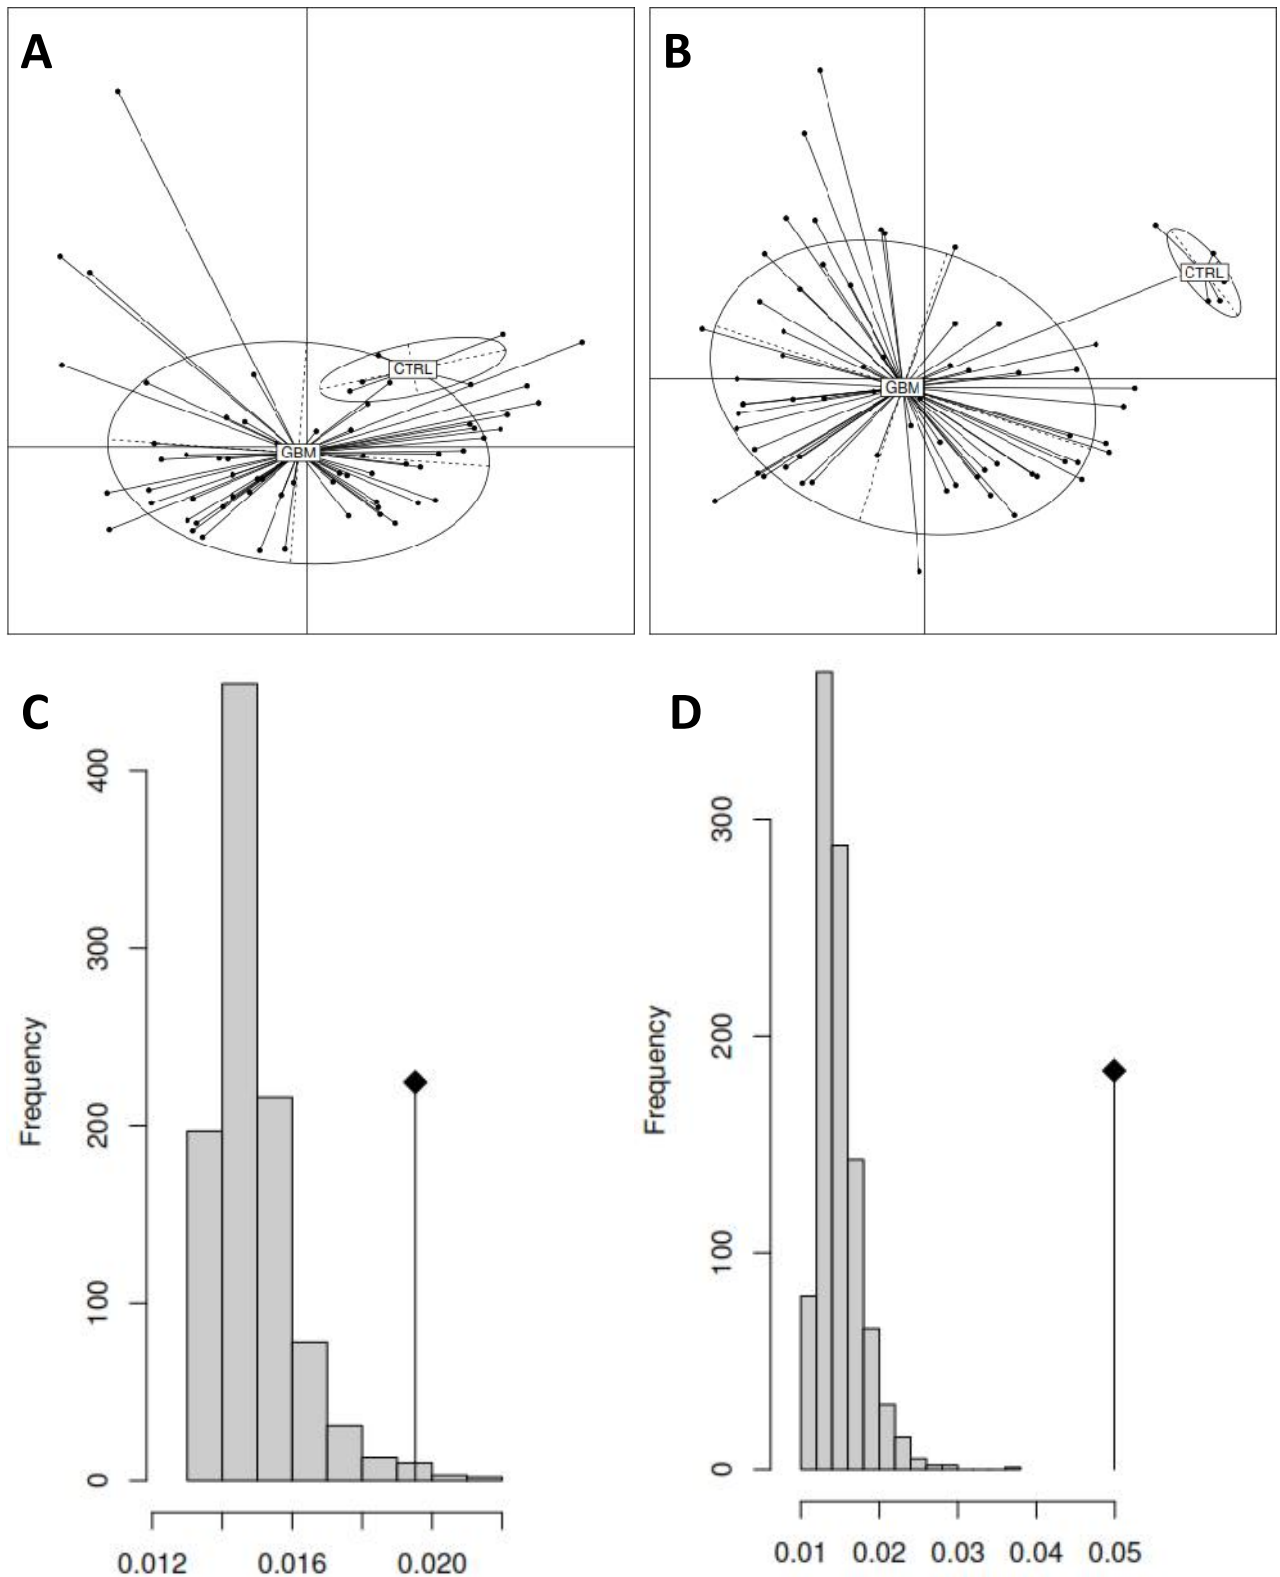

**Figure S5 - Principal coordinate analysis (PCO) for MethylCap-seq (A, C) and HM450 data (B, D).** PCO plots (A, B) as well as permutation based significance testing (C, D) indicate significant global differences between tumour (GBM) and control (CTRL) samples (MethylCap-seq:  $P = 0.009$ ; HM450:  $P < 0.001$ ). Histograms in panels C and D represent null distributions for 1000 permutations, observed differences are indicated by rhombuses and vertical lines.
